# Supplementary material
Source: PubMed Central journal article supplement (PMC7425979)
Supplement: NIHMS1608969-supplement-Supplemental_figures_1-8_and_tables_1-4.pdf [file NIHMS1608969-supplement-Supplemental_figures_1-8_and_tables_1-4.pdf]

## Supplementary information

**Tumor-suppressor *miR-22* determines p53-dependent cellular fate through post-transcriptional regulation of p21**

Supplementary information includes Extended Materials and Methods, eight figures and four tables.

## Materials and Methods

### Cell culture

HCT 116 (HCT 116 p53<sup>+/+</sup>), HCT 116 p53<sup>-/-</sup> and SW480 colon cancer cell lines were maintained in Dulbecco's Modified Eagle's Medium (DMEM) supplemented with 10% heat inactivated fetal bovine serum (FBS) in humidified air with 5% CO<sub>2</sub>. For treatment with genotoxic agents, HCT 116 cells were seeded at 1.0 x 10<sup>5</sup> cells/ml, and incubated with either 100, 200 and 500 ng/ml of ADR or 0.38 mM of 5-FU for specific periods.

### Clinical samples

Paired surgical specimens of primary human colon cancers and surrounding non-cancerous counterparts of the colon were obtained from patients treated at the Teikyo University Hospital, Mizonokuchi, Kanagawa, Japan with documented informed-consent in each case. Institutional review board approvals for analysis of

clinical samples were obtained at each institute. Samples were frozen in liquid nitrogen and stored at -80 °C until use. Total RNAs and genomic DNA were prepared by using Trizol (Invitrogen) and DNA extraction kit (Qiagen), respectively, according to the manufacturers' instructions.

### **Functional miRNA dropout screening**

Functional dropout screening to identify tumor-suppressor miRNAs was carried out according to our recent publication (1). In brief, HCT 116 cells were transduced with a pooled lentivirus miRNA expression library (SBI) at a multiplicity of infections (MOI) of 3. Cells were incubated in complete medium for 3 days (P1) and subjected to sequential passages every 3 days. After 9 passages, genomic DNA was prepared from P1, P5 and P9 cells using a DNA extraction kit (Qiagen) and used as a template for PCR amplification of pre-miRNA regions of virus vectors using a primer set corresponding to vector arms as follows; CDH5.1 5'-GCC TGG AGA CGC CAT CCA CGC TG- 3', CDH3.1 5'-GAT GTG CGC TCT GCC CAC TGA C-3'. Amplified DNA from P1, P5 and P9 cells was purified using a gel extraction kit (Qiagen) and subjected to fluorescence labeling. Amplified DNAs from P1 and P5 (or P9) cells were labeled with Cy3 and Cy5-dUTP, respectively, using a Genomic DNA enzymatic labeling kit (Agilent) and purified with a Microcon YM-30 filter (Millipore). An equal amount of Cy3- and Cy5-labeled DNA was combined and loaded onto a custom-made microarray, and hybridized at 65 °C for 24 hr. After washing, microarray was scanned and analyzed according to the CGH protocol ver. 5 (Agilent). The log ratio of each miRNA copy number was calculated by averaging log<sub>10</sub> ratios and by excluding the highest and lowest values in 16 replicates.

### **Real-time PCR**

For quantitative expression analysis of miRNAs, total RNAs from colon cancer patients were reverse-transcribed by Multiscribe RT and miRNA-specific primer (ABI), and a PCR reaction was carried out by using a TaqMan microRNA assay kit (ABI). The comparative cycle threshold (Ct) method was applied to evaluate the expression level of miRNA. The *U48* small nuclear RNA was used as an internal standard.

For mRNA expression analysis, total RNAs (~ 1 µg) were reverse-transcribed by SuperScript III reverse transcriptase using a random hexamer primer. Synthesized cDNAs were quantified by TaqMan Gene expression analysis. Relative expression was calculated as described above. *GAPDH* was used as an internal standard.

### **miRNA microarray analysis**

Total RNAs from non-cancerous parts of 4 colon cancer specimens were labeled with pCp-Cy3 using the Agilent miRNA labeling reagent, and then hybridized to an oligonucleotide microarray for human miRNA (8 x 15K, Version 2.0, Agilent) according to the manufacturers' instructions. After hybridization, the array was washed with washing buffer and scanned by an Agilent DNA microarray scanner. The data were numerically converted with Feature Extraction Software (Version 9.5 Agilent), and analyzed by GeneSpring GX10 software.

### **Array comparative genomic hybridization (aCGH) analysis**

For aCGH analysis, 500 ng of genomic DNA from the cancerous and non-cancerous parts of the colon cancer specimens were labeled with Cy5 and Cy3, respectively, and then digested with restriction endonucleases *Alu* I and *Rsa* I. Equal

amounts of labeled DNA were combined and loaded onto a Human Genome CGH microarray 244K (Agilent), and hybridized for 40 hr at 65 °C. After hybridization, the array was washed and scanned as described above, and analyzed by DNA Analytics Software (Ver. 5.0, Agilent).

### **Expression microarray analysis**

HCT 116 cells were transfected with either *miR-22* or miR-NC (final concentration of 1 nM) for 3 days and total RNA was prepared by an RNeasy column (Qiagen). Total RNAs were labeled with Cy3 using an mRNA labeling kit and hybridized to a whole human genome oligo microarray (4 x 44K, Agilent) according to the manufacturers' instructions. Data analysis was performed by GeneSpring GX10.

### **Copy number assay**

The copy number differences of *TP53* or *miR-22* genomic loci in 36 colon cancer patients from NCI were analyzed by quantitative real-time PCR using a TaqMan Copy Number Assay kit according to the manufacturers' instructions. The comparative cycle threshold (Ct) method was applied to evaluate the copy number of these loci using *Line-1* as an internal standard, which is a repetitive element whose copy numbers per haploid genome are similar among all human cells (2, 3). The copy number of *TP53* and *miR-22* in colon cancers were compared to that of their matched normal counterparts.

### **Cell proliferation assay**

HCT 116 cells, seeded at  $2.5 \times 10^4$  cells/ml, were transfected with either *miR-22* or miR-NC using HiperFect reagent (Qiagen) for 3 days. Cells were washed with PBS (-)

and incubated in MST reagent (Promega) for 60 min at 37 °C, and the absorbance at 490 nm was measured using an Arvo plate reader (Stratagene).

#### **Isolation of *C17orf91* cDNA**

Total RNA from HCT 116 cells was reverse-transcribed with an oligo(dT) primer, and used as a template for the amplification of *C17orf91* cDNA using the primer sets described in Fig. S4. Amplified PCR products were ligated into the pPCR2 vector and sequenced, and the *C17orf91* cDNA was subcloned into the pcDNA3.1 (Invitrogen) expression vector.

#### **Chromatin immunoprecipitation (ChIP)**

ChIP analysis was carried out as described (4) with modifications. HCT 116 cells, seeded at  $2 \times 10^5$  cells/ml in a 150 mm dish, were treated with 0.38 mM of 5-FU for 16 hrs or 5, 25 nM of Act D for 24 hrs, and fixed by 1% formaldehyde for 10 min at room temperature. After shearing DNA, an extract was incubated with DO-1 p53 antibody or normal mouse IgG for overnight at 4 °C, and precipitated DNA fragments were quantified by real-time PCR analysis using primer sets (Table S1). Data was normalized to input DNA.

#### **ChIP-sequence**

HCT 116 cells were treated with 5-FU (0.38 mM) for 9 h, and chromatin immunoprecipitation (ChIP) was performed by using anti-p53, anti-mono or anti histone H3 tri-methylated K4, or anti histone H3 tri-methylated K36 antibodies. ChIP isolated DNA (5-10 ng) was purified by polyacrylamide gel electrophoresis to obtain

100-300 bp DNA fragments. Collected DNA fragments were labeled with a single adenosine nucleotide by using Klenow exo- DNA polymerase (3' and 5' exo minus; Illumina). Illumina adaptors were then added to labeled DNAs, and subjected to PCR amplification for 20 cycles according to the manufacturers' instructions. After purification of PCR products, cluster generation and 36 cycles of sequencing reactions were carried out by an Illumina cluster station and 1G analyzer. Nucleotide sequences derived from 26,737,039 reads were mapped to the reference human genome (NCBI build #36).

#### **AGO2-IP on Chip analysis**

AGO2 immunoprecipitation on Chip assay was carried out according to a previous report with minor modifications (5). In brief, HCT 116 cells stably expressing HA-AGO2 cells were transfected with either *miR-22* or miR-NC at a final concentration of 20 nM for 24 hr, and disrupted in lysis buffer composed of 50 mM Tris-Hcl (pH 7.5), 1% NP-40, 1 mM EDTA, 5 mM DTT, 1 x proteinase inhibitor cocktail (Roche), 300 mM NaCl, and RNasin Plus ribonuclease inhibitor (Promega), and immunoprecipitated using anti-HA agarose beads pre-blocked with 1% BSA and 10 µg/ml of yeast tRNA, for 4 hr at 4 °C. Beads were washed with lysis buffer 5 times, AGO2-bound RNA was eluted in boiling water, and the Trizol-LS reagent was added to extract total RNAs. AGO2-bound total RNAs were further cleaned-up using an RNeasy column and subjected to microarray analysis. After the washing and scanning of the array, data were analyzed. Briefly, normalized signal intensities of AGO2-bound mRNAs in the presence of *miR-22* were divided by those of miR-NC introduced cells. In parallel, an mRNA expression profile of HCT 116 cells in the presence or absence of *miR-22* was

generated, and expression fold-changes were obtained. An enrichment score (E-score) was then calculated by division of fold changes of AGO2-bound mRNA by expression changes. Thus, a high E-score indicates AGO2-bound and down-regulated mRNAs in a *miR-22* dependent manner. Furthermore, cell cycle and apoptosis regulating genes were selected among high E-scored mRNAs.

### Reporter plasmid construction and luciferase assay

The 3' UTR of *p21* mRNA was amplified by PCR from HCT 116 genomic DNA using a primer set; 5'-TCC GCC CAC AGG AAG CCT GC-3', 5'-GAG CAC CTG CTG TAT ATT CAG C-3'. The DNA fragment was cloned into a pCR2 vector and sequenced, and then fused to the 3' end of a firefly luciferase reporter gene in the pmirGLO dual luciferase vector (Promega). Site directed mutagenesis of a *miR-22* target site of *p21* mRNA was carried out by using a PrimeSTAR Max high fidelity DNA polymerase using the pmirGLO-p21 3'UTR plasmid as a template. Mutagenesis primers are listed below.

p21 5' seed Fw-EcoRV, 5'-TCA GGg ata tca AGC AGC GAC CGC CCC CT-3'

p21 5' seed Rev-EcoRV 5'-GCT Tga tat cCC TGA GGT AGA ACT AGG G-3'

p21 3' Rev-EcoRI 5'-TGA GGg aat tcT AGG GTG CCC TTC TTC TT-3'

p21 Double Fw-RV-RI 5' CCT Aga att cCC TCA GGg ata tca AAG CA-3'

Nucleotide sequences of the 5' seed and 3' regions of the *miR-22* target site in the *p21* mRNA were replaced with the recognition sequences for *EcoRV* and *EcoRI*, respectively (underlined sequences).

For the luciferase assay, HCT 116 cells, seeded at  $5 \times 10^4$  cells/ml, were co-transfected with 200 ng of reporter plasmid and 10 nM of either *miR-22* or miR-NC using Lipofectamine 2000 according to the manufacturer's protocol for siRNA

introduction. After incubation for 24 hr, cell extracts were prepared by adding passive lysis buffer (Promega) and luciferase activities were determined by using a dual luciferase assay kit (Promega). Luciferase activity was normalized by *Renilla* luciferase activity as an internal standard.

### **Immunoblot analysis**

Cells were lysed in lysis buffer consisting of 25 mM Tris-HCl (pH7.5), 150 mM NaCl, 1 mM EDTA, 1% Triton X-100, 0.1% SDS and 1 x proteinase inhibitor cocktail, and protein concentration was determined by the Bradford method using the Bio-Rad protein assay reagent. For SDS-PAGE and immunoblot analyses, protein samples were mixed with Laemmli sample buffer, and loaded on a 10-20% polyacrylamide gradient gel (ATTO). After electrophoresis, proteins were transferred to a PVDF membrane (Millipore), and analyzed by the standard method.

### **Indirect immunocytochemistry**

HCT 116 cells, transfected with either *miR-22* or miR-NC for 48hr, were treated with 50 ng/ml of ADR for 5 or 10 hr, and fixed with cold methanol for 20 min. Cells were washed twice with PBS and incubated in blocking reagent (2.5% BSA/TBS-T) for 60 min, and further incubated for 60 min with a primary antibody against p21 diluted with blocking buffer. After reaction with a secondary antibody, (Alexa 594 labeled anti-mouse IgG) for 60 min, cells were washed with PBS, and subjected to microscopic observation.

### **Flow cytometric analysis**

HCT 116 cells were transfected with either *miR-22* or miR-NC, incubated for 48



hr, and treated with ADR overnight. Cells were detached from the bottom of the dish by adding trypsin, and stained with FITC-Annexine V and PI (BD Pharmingen). Cells were passed through a cell-strainer filter and subjected to flow cytometry using JSAN. Data were processed by FlowJo software.

### **Method References**

1. Izumiya M, Okamoto K, Tsuchiya N, Nakagama H. Functional screening using a microRNA virus library and microarrays: a new high-throughput assay to identify tumor-suppressive microRNA. *Carcinogenesis* 2010; 31: 1354-9.
2. Wang TL, Diaz LA, Jr., Romans K, Kinzler KW, Vogelstein B, Lengauer C, et al. Digital karyotyping identifies thymidylate synthase amplification as a mechanism of resistance to 5-fluorouracil in metastatic colorectal cancer patients. *Proc Natl Acad Sci U S A* 2004; 101: 3089-94.
3. Ugurel S, Houben R, Schrama D, Voigt H, Zapatka M, Schadendorf D, et al. Microphthalmia-associated transcription factor gene amplification in metastatic melanoma is a prognostic marker for patient survival, but not a predictive marker for chemosensitivity and chemotherapy response. *Clin Cancer Res* 2007; 13: 6344-50.
4. Wei CL, Wu Q, Vega VB, Chiu KP, Ng P, Zhang T, et al. A global map of p53 transcription-factor binding sites in the human genome. *Cell* 2006; 124: 207-19.
5. Karginov FV, Conaco C, Xuan Z, Schmidt BH, Parker JS, Mandel G, et al. A biochemical approach to identifying microRNA targets. *Proc Natl Acad Sci U S A* 2007; 104: 19291-6.

### Legends to Supplementary Figures

**Fig. S1. A.** Tumor-suppressor miRNA categories identified by the present screening. Experimental strategies used to screen tumor-suppressor miRNAs are also indicated. **B.** Schematic illustration of the functional dropout screen using a lentivirus miRNA expression library. **C.** The number of dropout miRNA clones in 3 settings of microarray analyses. **D.** Expression profile of dropout miRNAs in 4 human normal colon tissues. **E.** Copy number aberration of dropout miRNA genes in 24 human colon cancers.

**Fig. S2.** Copy number aberrations of *TP53* and *miR-22* loci in 36 human colon cancer patients. Copy number of *TP53* or *miR-22* loci in NCI samples (ID 1 – 36) were calculated by the TaqMan copy number assay system using *Line-1* as an internal standard. Graph indicates copy numbers of *TP53* and *miR-22* loci relative to those in matched normal counterparts. Marked (red circle) samples showed hemizygous loss of *miR-22* locus with intact *TP53*.

**Fig. S3. A.** Cell proliferation assay. HCT 116, HCT 116-p53<sup>-/-</sup> and SW480 cells were transfected with either 5 nM of *miR-22* or miR-NC, and incubated for 3 days. Cells were subjected to MST assay as described in Materials and Methods. Cell number was indicated by relative values to negative control cells. **B.** Cell cycle analysis. HCT 116 p53<sup>-/-</sup> and SW480 cells were transfected with either 5 nM of *miR-22* and miR-NC, and incubated for 3 days. Cell were fixed with ethanol and stained with PI, and then cell cycle distribution was analyzed by FACS. Representative cell cycle patterns in both cell lines are indicated. **C.** Quantification of cell number in each phase of cell cycle. Data indicates means from three independent experiments. Error bars show the standard

deviations. Statistical analysis was carried out by *t*-test. **D.** Network analysis. HCT 116 cells were transfected with either miR-NC or *miR-22*, and mRNA expression profiles were generated by means of microarray. Network analysis was carried out by MetaCore software (GeneGo Inc.)

**Fig. S4.** The nucleotide sequence of *C17orf91* is shown. Underlined sequences indicate the positions of the primers used to isolate the *C17orf91* cDNA from HCT 116 cells. A bold line shows the *pre-miR-22* sequence, and exon junctions are indicated as vertical lines.

**Fig. S5. A.** Expression of *miR-22* after exposure to 5-FU. Cells, seeded at  $1.0 \times 10^5$  cells/ml, were treated with 0.38 mM of 5-FU for 12 h, and *miR-22* expression was quantified by TaqMan real-time RT-PCR. The data indicate the relative expression levels of *miR-22* compared with un-treated cells. **B.** Structure of a luciferase reporter gene construct containing a *miR-22* gene promoter region. The genomic region containing p53 binding sites in a 5' upstream and intron 2 was amplified by PCR from genomic DNA of HCT 116 cells as a template. The DNA fragment was sequenced and subcloned into a pGL3 basic vector. **C.** Reporter gene assay. Cells, seeded at  $1.0 \times 10^5$  cells /ml, were transfected with 200 ng of luciferase reporter gene and 10 ng of control pRL vectors, and incubated for 24 h. Luciferase activity was measured by using a dual luciferase assay kit (Promega), and the data indicates means with standard deviations (n=6). **D. E.** p53-ChIP analysis. Cells, treated with 0.38 mM 5-FU for 16 hrs, were fixed with 1% formaldehyde, and subjected to ChIP analysis. Quantification of precipitated DNA was carried out by real-time PCR analysis in triplicate by using primers spanning

p53 binding site of p21 (positive control), *miR-22* -1104 #1, *miR-22* -1104 #2 (for 5' promoter region), Int2 (for p53BS in intron 2) and IGX1A (ChIP-qPCR human negative control, SABiosciences). Graph indicates fold enrichment of site occupancy for p53 binding relative to non-stressed cells (D), and percent of input (E). Data indicates means with standard deviation of triplicate qPCR. Statistical analysis was carried out by *t*-test. Additional two independent experiments gave similar results.

**Fig. S6. A.** An outline of AGO2-IP on Chip is schematically drawn. HCT 116 cells stably expressing HA-AGO2 were established and transfected with either *miR-22* or miR-NC. After incubation for 24 hr, cells were lysed in lysis buffer and AGO2 complexes were purified by anti-HA antibody. Purified RNAs were used for microarray analysis. **B.** The enrichment score (E-Score) was calculated with the indicated formula, and the criteria used for the selection of *miR-22* target mRNAs are listed. **C.** Distribution of enrichment score (E-Score) of mRNAs selected by AGO2-IP on Chip. Green and red dots indicate the E-score and fold change of mRNA expression in *miR-22* introduced cells, respectively. mRNA species with high E-Score tend to show relatively low expression in the presence of *miR-22*. **D.** Top10 mRNA list enriched in AGO2 complex after *miR-22* introduction. *CDKN1A* (*p21*) is shaded by a yellow line. **E.** The *miR-22* target sequences in the 3' UTR of *p21* mRNA in various mammalian species are aligned. The *miR-22* target sites in the 3' UTR of *p21* mRNA were searched for using the TargetScan database. The conserved target sites in the 3' UTR of *p21* mRNA are aligned against the 5' seed (red) and 3' complementary sequences (blue) from various mammalian species. The nucleotide sequence of *miR-22* is shown at the top.

**Fig S7. A.** Introduction of *miR-22* significantly reduced the p21 protein levels after exposure to ADR. Cells transfected with either *miR-22* or miR-NC were treated with indicated concentrations of ADR for 24 h, and p21 levels were determined by IB analysis. The data were prepared from three independent experiments, and indicated relative p21 protein levels compared with miR-NC transfected cells (lane 2). **B.** Repression of PARP-1 cleavage by introduction of p21 ORF. The data are related to Fig. 5C in the text. Two independent experiments of IB images are indicated. **C.** siRNA knockdown promotes PARP-1 cleavage. Cells were transfected with 5 nM of p21 siRNA (Qiagen #7) and negative control (Qiagen) for 48 h, and cells treated with indicated concentrations of ADR for 24 h, then cleaved PARP-1 was determined by IB. **D.** Inhibition of *miR-22* caused reduction of the S-phase of cell cycle. HCT 116 cells were infected either pZip-22 or control lentivirus, and selected by puromycin. Cells were reseeded at  $1.0 \times 10^5$  cells/ml and treated with ADR for 24 h. FACS was carried out by PI staining, and the number of cells in each phase of the cell cycle was analyzed by FlowJo software.

**Fig. S8. A. B.** p53-ChIP analysis. HCT 116 cells, seeded at  $2 \times 10^5$  cells/ml in 150 mm dish, were treated with 5 or 25 nM of Act D for 24 hrs, and fixed with 1% formaldehyde for 10 min, then subjected to ChIP analysis as indicated in Supplementary Materials and Methods. Quantification of precipitated DNA was carried out by quantitative real-time PCR analysis in triplicate with primers spanning p53 binding site of *p21*, *miR-22*-1104#1, *miR-22*-1104#2, Int2 and *IGX1A* (negative control, SABiosciences). Graph indicates fold enrichment of site occupancy for p53 binding relative to non-stressed cells (A), and percent of input (B). Data indicates means with standard deviation of triplicate

qPCR. Statistical analysis was carried out by *t*-test. Additional two independent experiments gave similar results.

A

| Criteria                              | Experimental Strategy                                             |
|---------------------------------------|-------------------------------------------------------------------|
| 1. Repressor of cell proliferation    | Functional dropout screening using colon cancer cell line         |
| 2. Expressed in normal colon          | Comprehensive expression profile in non-cancerous colon tissues   |
| 3. High frequency of chromosomal loss | Comparative genomic hybridization (aCGH) in colon cancer patients |
| 4. Down-regulated in cancer patients  | Quantitative RT-PCR using colon cancer samples                    |

B

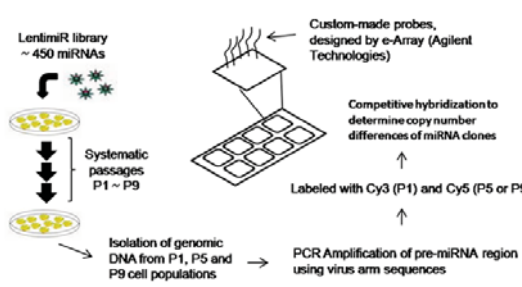

C

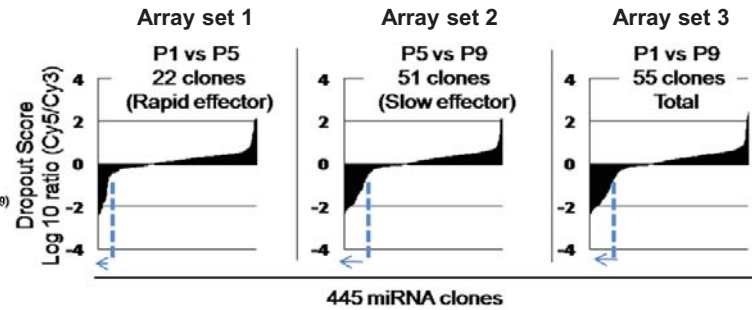

D

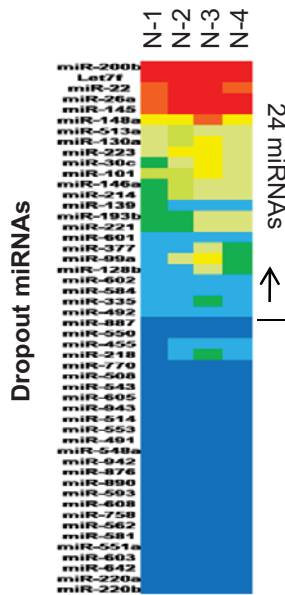

E

| miRNA    | Chromosomal localization       |                              | Copy number aberration |
|----------|--------------------------------|------------------------------|------------------------|
|          |                                |                              | Loss (n=24)            |
| mir_22   | 17: 1563947-1564031 [-]        |                              | 19                     |
| mir_200b | 1: 1092347-1092441 [+]         |                              | 11                     |
| mir_101  | 1: 65,524,117-65,524,191 [-]   | 9: 4,850,291-4,850,381[+]*   | 9                      |
| mir_30c  | 1: 41,222,956-41,223,044 [+]   | 6: 72,086,663-72,086,734[-]* | 8                      |
| mir_377  | 14: 100598140-100598208 [+]    |                              | 8                      |
| mir_130a | 11: 57,408,671-57,408,759 [+]  |                              | 8                      |
| mir_145  | 5: 148790402-148790489 [+]     |                              | 5                      |
| mir_146a | 5: 159,912,359-159,912,457[+]  |                              | 5                      |
| mir_128  | 2: 136139437-136139518 [+]     | 3: 35760972-35761055 [+]*    | 4                      |
| mir_139  | 11: 72,326,107-72,326,174[-]   |                              | 4                      |
| mir_584  | 5: 148422069-148422165 [-]     |                              | 4                      |
| mir_602  | 9: 139852692-139852789 [+]     |                              | 4                      |
| mir_26a  | 3: 37985899-37985975 [+]       | 12: 56504659-56504742 [-]*   | 3                      |
| mir_335  | 7: 129923188-129923281 [+]     |                              | 3                      |
| mir_492  | 12: 93752305-93752420 [+]      |                              | 3                      |
| mir_99a  | 21: 17,911,409-17,911,489[+]   |                              | 3                      |
| mir_193b | 16: 14,397,824-14,397,906[+]   |                              | 2                      |
| mir_601  | 9: 126,164,804-126,164,882 [-] |                              | 2                      |
| mir_148a | 7: 25956064-25956131 [-]       |                              | 0                      |
| mir_214  | 1: 172,107,938-172,108,047[-]  |                              | 0                      |

Fig. S1

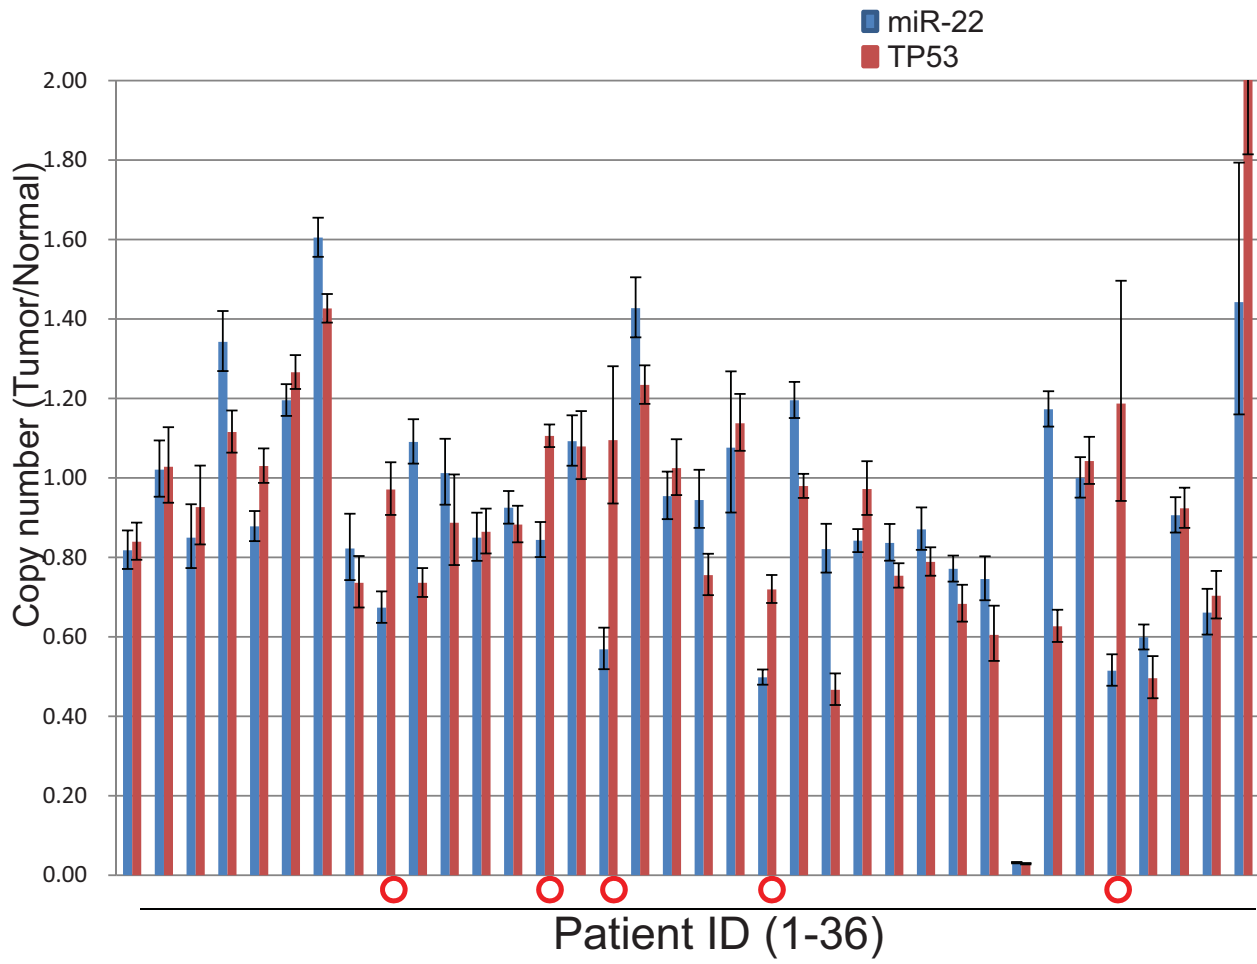

Fig. S2



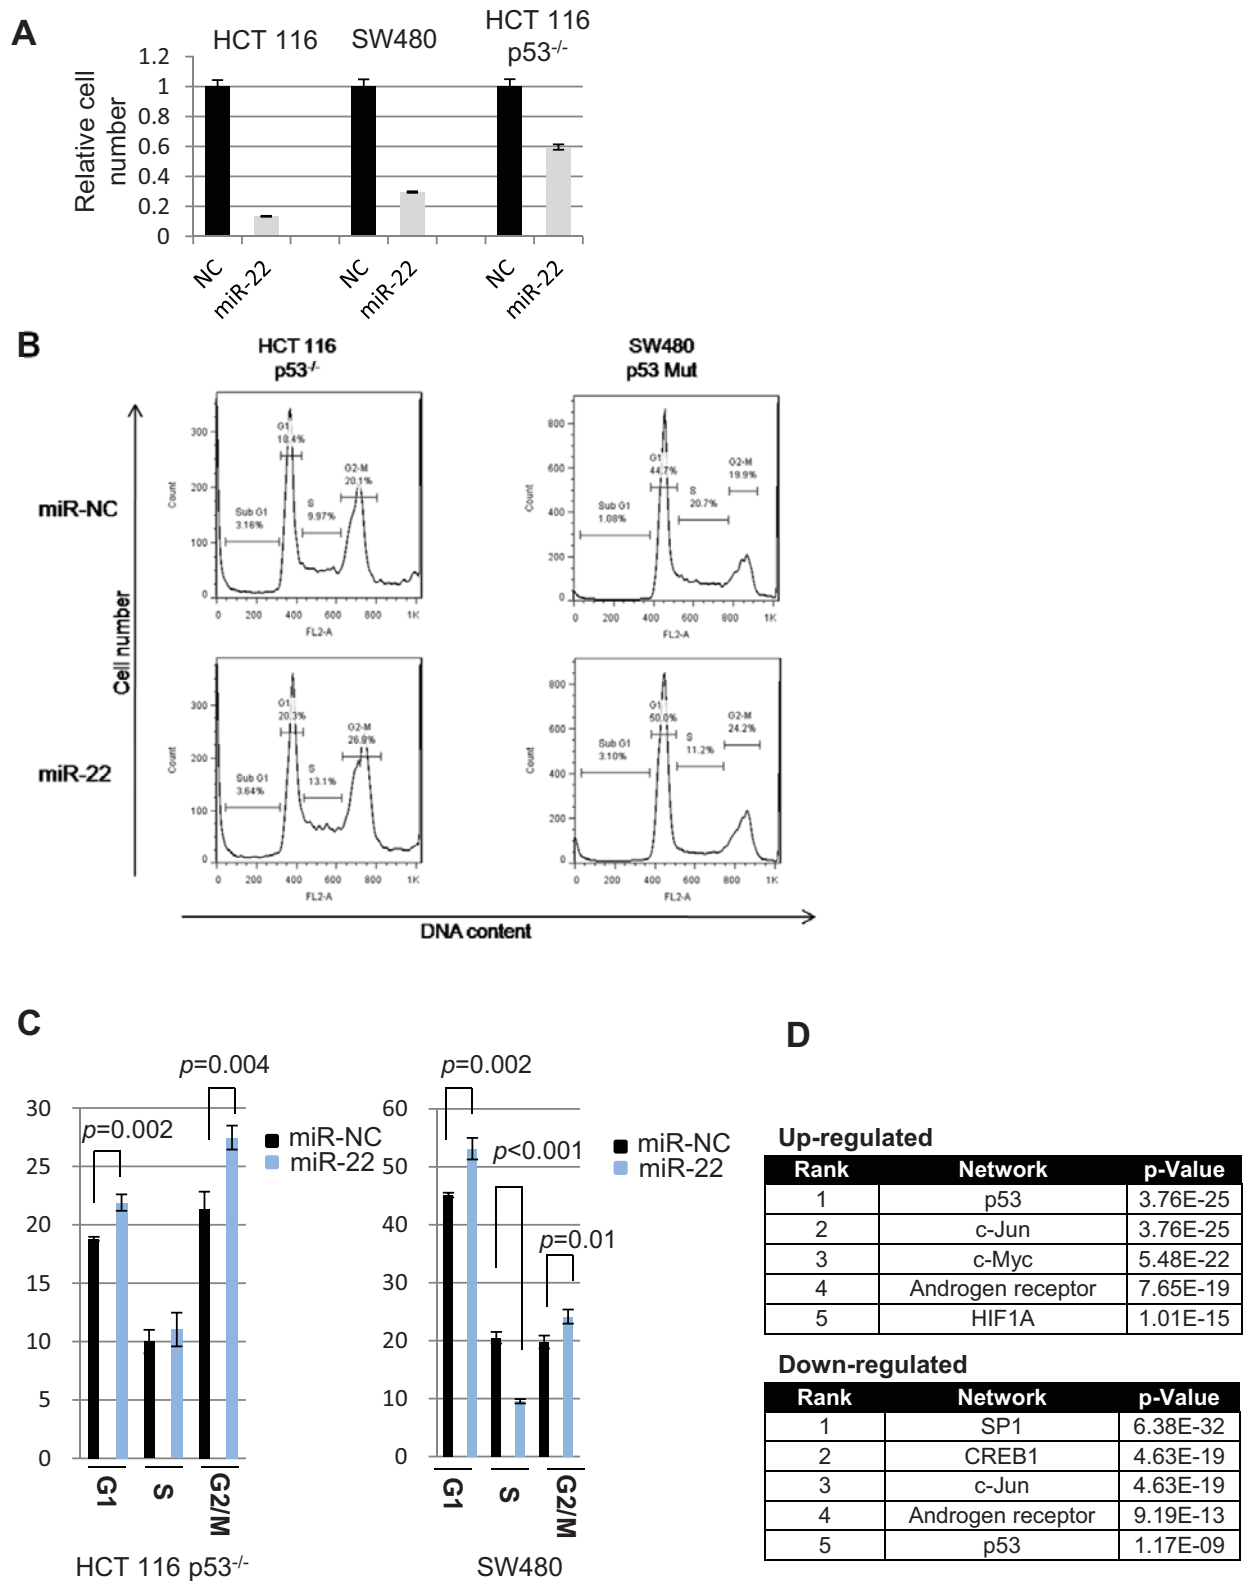

Fig. S3

AAGAGACAGCGCCGCGCCGGCCGTGGGGAGCGGACGCAGTGATTTGCTCCCCCTCGTGCAGC 60  
 AACCCCCACACCCAGCACCAGGCCCCCAGAACTCTCCTTCCAGCTGAACTCCCTGGGAAC 120  
 AAGTCAGTTGGGCTGATCACTGAACTCACATTTCTGGACCTGAGGAGCCTGTTCTCTCA 180  
 CGCCCTCACCTGGCTGAGCCGCAGTAGTTCTTTCAGTGGCAAGCTTTATGTCCTGACCCAG 240  
CTAAAGCTGCCAGTTGAAGAACTGTTGCCCTCTGCCCCTGGCTTCGAGGAGGAGGAGGAG 300  
 CTGCTTTCCCCATCATCTGGAAGGTGACAGAAATGGGCTGGGAAGGTCCGAACAGCAGGG 360  
 TGGATGATACGTTTTGGGCAAGTTGGAGAGCCTTTGCCCAGATTGGCCCAGCAAGGAGCG 420  
 GTTTTAGATTAGAGACACTGGCTGGATTGAGGAGTAGAAGGCTCAAACAACCCAAGGCTT 480  
 TCTGCCTCCGAGATGTGGCACCATAGTGCGGTGCCTGTGGCTTCACCGCCCTACTTCCA 540  
 CCTCCGCCCAGCCTGTAATGTTTATATAAGCAGCCTCAAGGACCAAGAACCATCTGCGAA 600  
 AGGACACACACAGGAAATTCATAAAAGAAATCTGAATGGATAAAACCATGAAAAAAGTA 660  
 TGCTTCATTAGTAATTAAAGAAAGGCAAATAGAGCTGGAAGCATTTTTCCCTTAGCAAAC 720  
 CATAACAGAAAAAATAAGACCCAATATTGGCAAAGAGACTACTGAAAAAACATTCCCAT 780  
 ACATTGCGTGTGGGAGTATACATCGGTGCAGGCTTCCTGGATGACAGTTGGGTGATATGT 840  
 GTCATGTGGCCTAAAAGCCTCCATGTCATTTGACCTACGAATTCTATCTTTGGGAATTTA 900  
 TCCTAAGAAAATACTTAAGGATTTAGTTAGTGATAAGATGTTTCATCCCAGCATTGCAATG 960  
 GAGAAAAATGGGAAGCAATGGTTTGGTTGGGAATTTATTCCCTTTTCTGCTGTAACGAAAG 1020  
 TTTGCAATAGGGGATTGCTTAAGTAAATTATTGTATCTCCATCCAGATGGTGGAGTACCG 1080  
 CGCAGACATTAAGATCATGTAAGAACATCTGACTGAAAGAAAAATGCTCCTTGAATA 1140  
 TTAAGGTTGTAAGAAATAGTGCATGTTATGTGATTTCAATTTTGTTTTTTAAATATGG 1200  
 GTGTATGCTTGTATACGTAGAGCAGATAAAAAAGACGGAAGGCATACTAAAAAATGTTGA 1260  
GTGGTTATCTTTGTATGGTGGAACAAAGTCACTGTAATTTTCATCTTTGGTTTTTCTGTA 1320  
 ATTTCCAAATTTCCACATTTTGTATTTTCATATAATATAATTTAAGA 1367

→ Ex 2

Fw Primer

→ Ex 3

Pre-miR-22

→ Ex 4

Rev Primer

Fig. S4

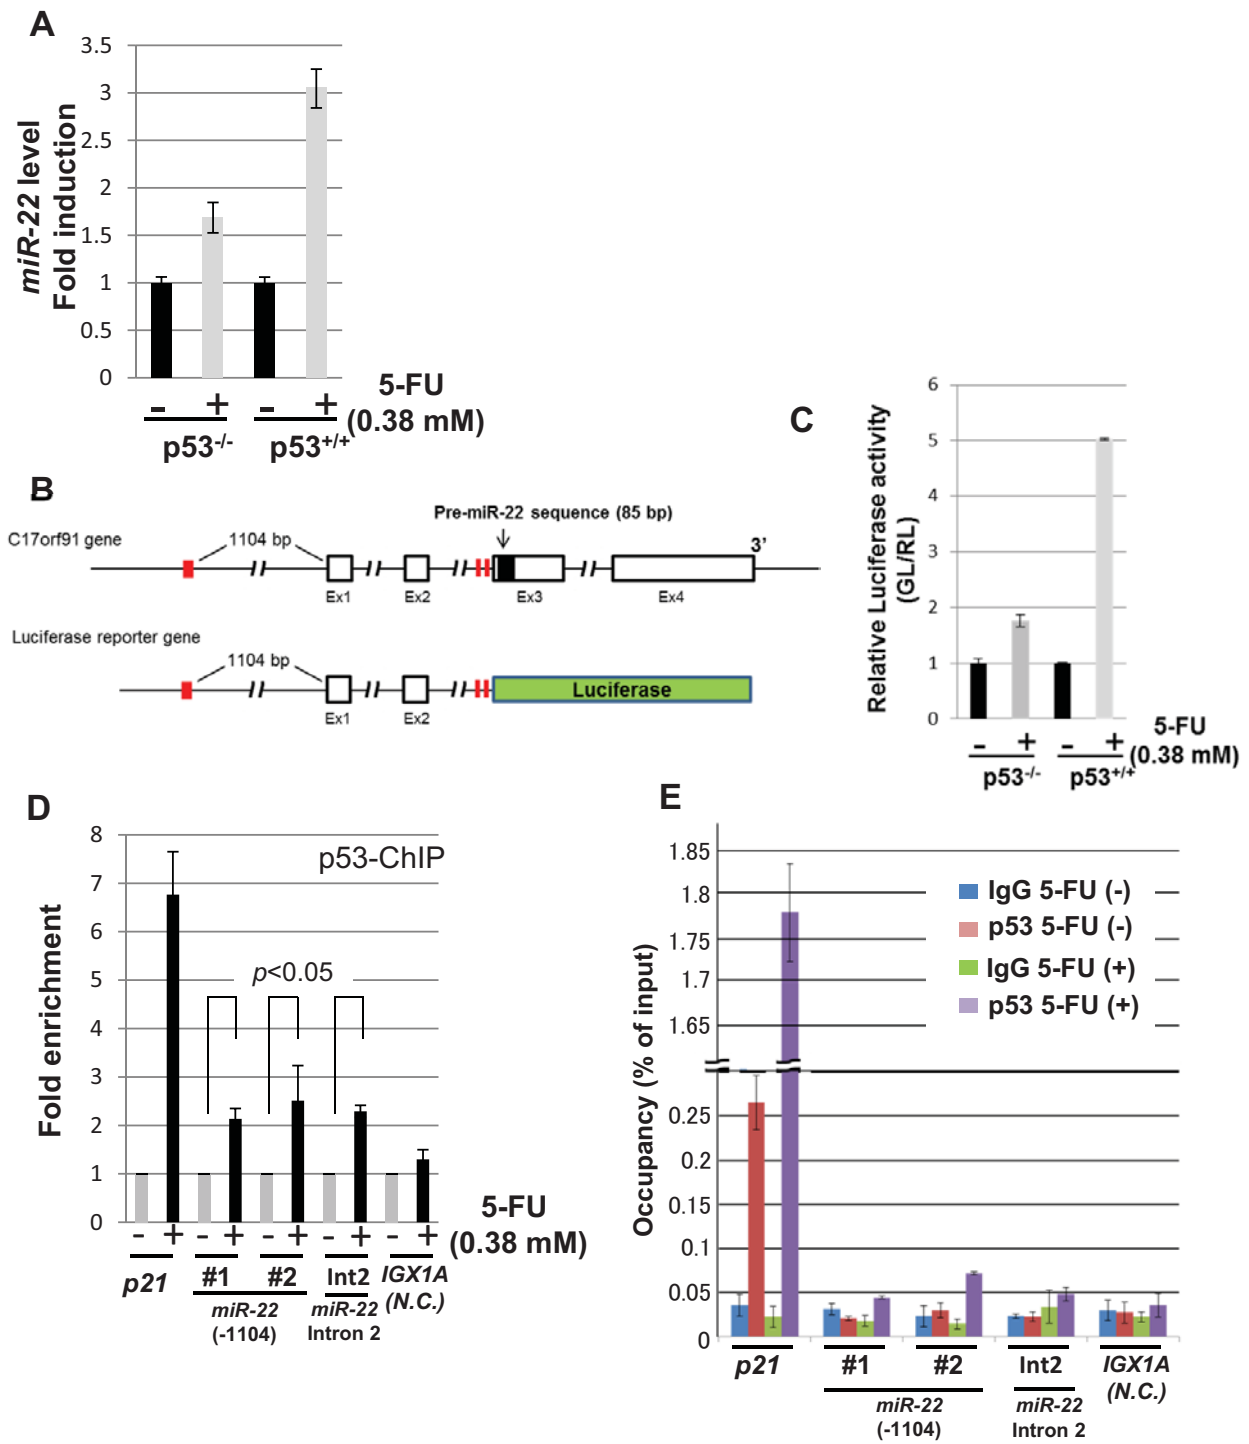

Fig. S5

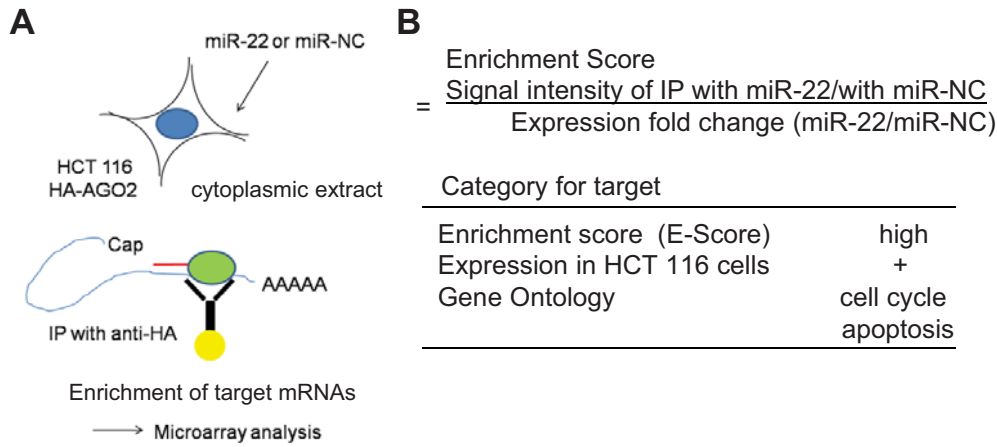

**B**

$$\text{Enrichment Score} = \frac{\text{Signal intensity of IP with miR-22/with miR-NC}}{\text{Expression fold change (miR-22/miR-NC)}}$$

Category for target

|                             |                         |
|-----------------------------|-------------------------|
| Enrichment score (E-Score)  | high                    |
| Expression in HCT 116 cells | +                       |
| Gene Ontology               | cell cycle<br>apoptosis |

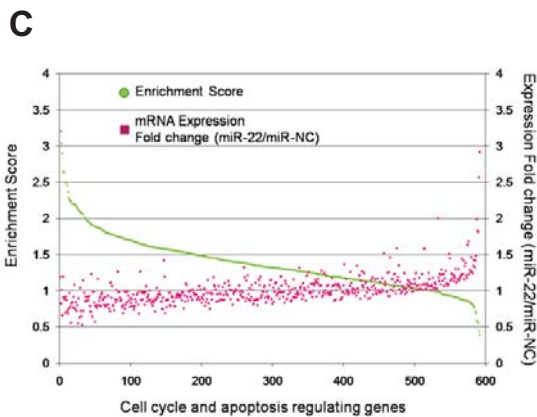

**D**

| Gene           | Enrichment Score | Fold change (22/hc) |                                                                          |
|----------------|------------------|---------------------|--------------------------------------------------------------------------|
| SON            | 15.614           | 1.189               | anti-apoptosis                                                           |
| TNFRSF10C      | 3.199            | 0.821               | apoptosis, signal transduction                                           |
| NUPR1          | 3.035            | 1.011               | induction of apoptosis                                                   |
| Ckor127        | 2.899            | 0.656               | regulation of progression through mitotic cell cycle                     |
| ASPM           | 2.640            | 1.198               | cell cycle, mitosis, cell division                                       |
| CLN3           | 2.635            | 0.906               | negative regulation of apoptosis                                         |
| KATNB1         | 2.503            | 0.888               | negative regulation of microtubule depolymerization, cell cycle, mitosis |
| <b>CDKN1A*</b> | <b>2.500</b>     | <b>0.697</b>        | <b>cell cycle arrest, negative regulation of apoptosis</b>               |
| TXNL4B         | 2.496            | 0.919               | mRNA processing, cell cycle, mitosis                                     |
| CHMP1A         | 2.488            | 0.876               | mitotic chromosome condensation                                          |

**E**

3' - UGU**CAAGA**AGUUGAC**CCGUCGAA**-5' *has-miR-22*

Human AAGAAGGGCACCCU**AGUUCU**ACCUC**AGGCAGCU**CAAGCAGCGACCGC---

Chimpanzee AAGAAGGGCACCCU**AGUUCU**ACCUC**AGGCAGCU**CAAGCAGCGACCGC-

Rhesus AAGAAGGGCACCCU**AGUUCU**ACCUC**AGGCAGCU**CAAGCAGCGACUCCG--

Mouse AAGUGGGAUUCCCU**GUUCU**ACCUC**AGGCAGCU**CCAGUGGCAACCC----

Rat AAGUGGGGUUCCCU**GUUCU**ACCUC**AGGCAGCU**CCAGUGGCAACUG-

Dog AAGUGGGGGUCCCU**AGUUCU**ACCUC**AGGCAGCU**CAAGCAGCGACCACC-

Cat AAGUAGGGGUCCCU**CGUUCU**ACCUC**AGGCAGCU**CAAGCAGUGG-----

Horse AAGCAGGGCUCUC**AGUUCU**CCUC**AGGCAGCU**CAAGCAGCGACCGCC-

Armadillo AAGCCGGGCCGCC**CAUUCU**ACCUC**AGGCAGCU**CAGGCAGCGACUGCCUC

Elephant AAGUUGGGAUUCCA**AGUUUU**ACCUC**AGGCAGCU**CAAGCAGUGACCACCUC

Tenrec AAGUAGGGAUUCCCU**AGUUCU**ACCUC**AGGCAGCU**CAAGCAGCGACCACCUC

Fig. S6

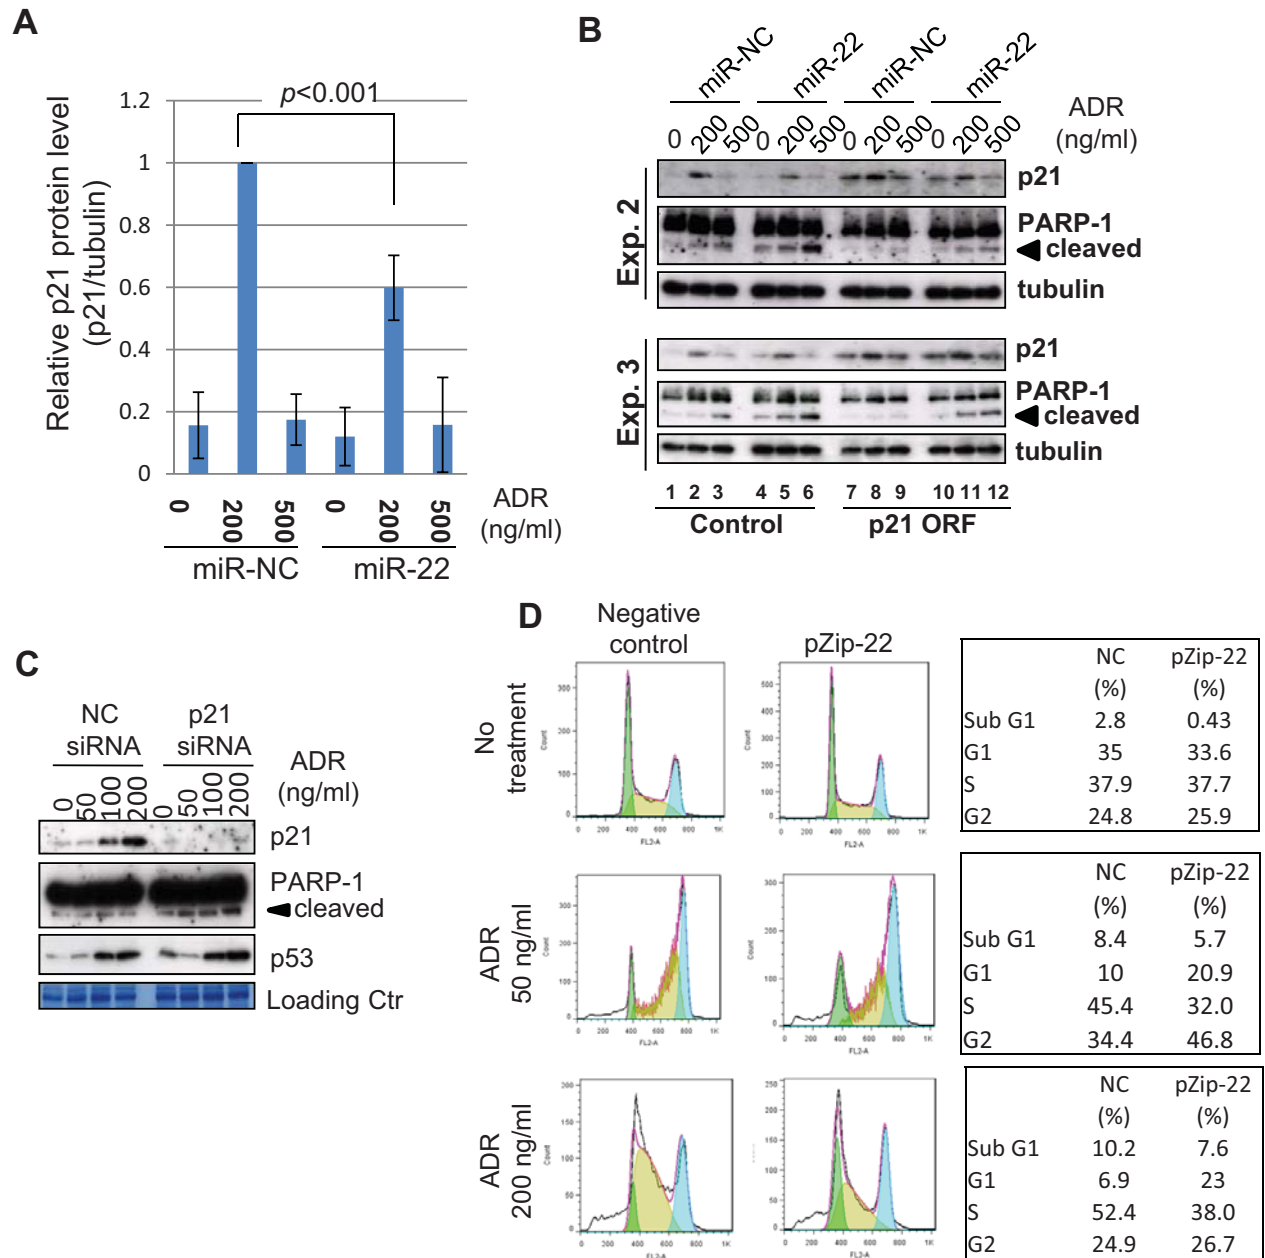

Fig. S7

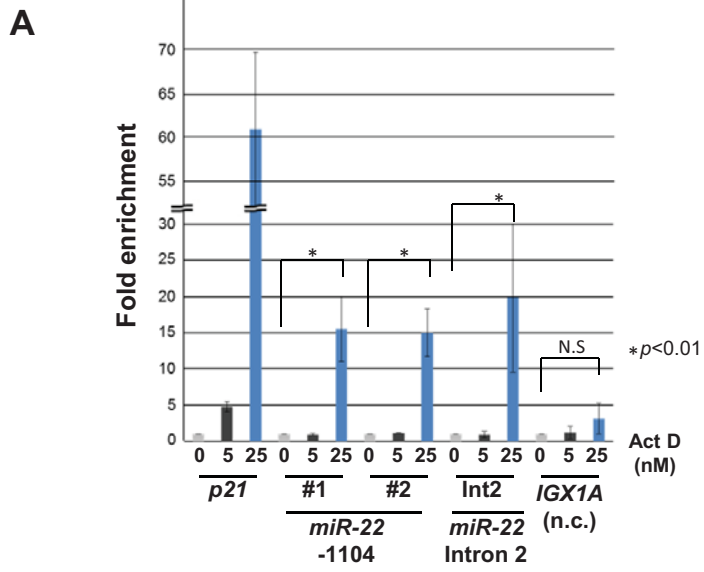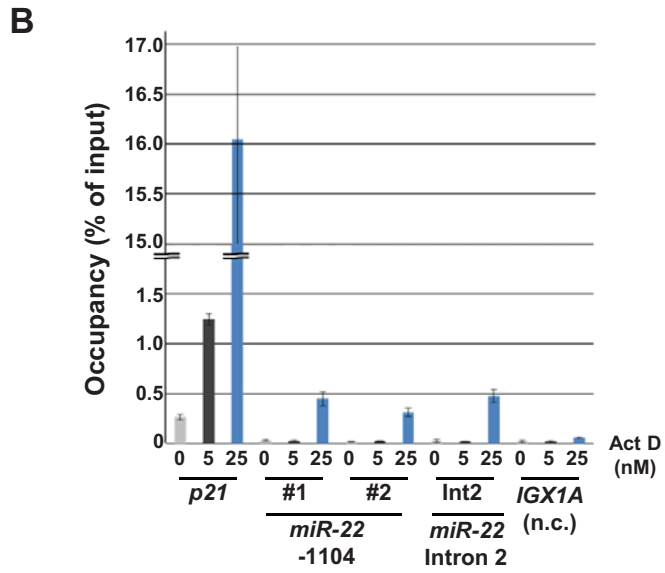

Fig. S8

**Table S1** Primer sequences used for this study

| Primer name                 | Nucleotide sequence                                         |
|-----------------------------|-------------------------------------------------------------|
| Vector primer CDH5.1        | 5'-GCC TGG AGA CGC CAT CCA CGC TG-3'                        |
| Vector primer CDH3.1        | 5'-GAT GTG CGC TCT GCC CAC TGA C-3'                         |
| p21 3' UTR Fw               | 5'-TCC GCC CAC AGG AAG CCT GC-3'                            |
| p21 3' UTR Rev              | 5'-GAG CAC CTG CTG TAT ATT CAG C-3'                         |
| Mutagenesis p21 5' seed Fw  | 5'-TCA GGg <u>ata tc</u> A AGC AGC GAC CGC CCC CT-3'        |
| Mutagenesis p21 5' seed Rev | 5' GCT Tga <u>tat c</u> CC TGA GGT AGA ACT AGG G-3'         |
| Mutagenesis p21 3' Rev      | 5'-TGA GGg <u>aat tc</u> T AGG GTG CCC TTC TTC TT-3'        |
| Mutagenesis Double Fw       | 5'-CCT Aga <u>att c</u> CC TCA GGg <u>ata tc</u> A AGC A-3' |
| p21 -2238 ChIP Fw           | 5'-AGC AGG CTG TGG CTC TGA TT-3'                            |
| p21 -2238 ChIP Rev          | 5'-CAA AAT AGC CAC CAG CCT CTT CT-3'                        |
| ChIP miR-22 -1104 #1 Fw     | 5'-GCA TGG ATT TCA GTC CAC AT-3'                            |
| ChIP miR-22 -1104 #1 Rev    | 5'-ATG AAC CCA GTG ACT TGG CA-3'                            |
| ChIP miR-22 -1104 #2 Fw     | 5'-CAG CTG ATT CGT CCC CAG AGG TCA-3'                       |
| ChIP miR-22 -1104 #2 Rev    | 5'-GGA GCT CCA AAA TTC TGA GCC TGC G-3'                     |
| ChIP miR-22 Int2 Fw         | 5'-GAC CTT CTT TCA AAC GCT AG-3'                            |
| ChIP miR-22 Int2 Rev        | 5'-ACG CAG GTA CTA GAA GTG TG-3'                            |

Table S2 Dropout Clones during culture of HCT 116 cells

| P1 vs P5     |              |             | P5 vs P9     |              |             | P1 vs P9     |              |             |
|--------------|--------------|-------------|--------------|--------------|-------------|--------------|--------------|-------------|
| miRNA clones | log 10 ratio | mature form | miRNA clones | log 10 ratio | mature form | miRNA clones | log 10 ratio | mature form |
| mir_455      | -2.3558      | miR-455     | mir_492      | -2.3219      | miR-492     | mir_455      | -2.2504      | miR-455     |
| mir_34a      | -2.2627      | miR-34a     | mir_593      | -2.1573      | miR-593     | mir_26a_1    | -2.2009      | miR-26a     |
| mir_486      | -2.1658      | miR-486     | mir_220a     | -2.1532      | miR-200a    | mir_145      | -2.1592      | miR-145     |
| mir_608      | -2.1589      | miR-608     | mir_145      | -2.1503      | miR-145     | mir_492      | -2.1258      | miR-492     |
| mir_942      | -2.1364      | miR-942     | mir_26a_1    | -2.1494      | miR-26a     | mir_593      | -2.1207      | miR-593     |
| mir_379      | -2.1319      | miR-379     | mir_758      | -2.1210      | miR-758     | mir_513a_1   | -2.0899      | miR-513a    |
| mir_562      | -2.0680      | miR-562     | mir_345      | -2.0961      | miR-345     | mir_758      | -2.0882      | miR-758     |
| mir_605      | -2.0587      | miR-605     | mir_543_     | -2.0699      | miR-543     | mir_513a_2   | -2.0478      | miR-513a    |
| mir_30d      | -1.9143      | miR-30d     | mir_346      | -2.0607      | miR-346     | mir_220a     | -2.0454      | miR-220a    |
| mir_891a     | -1.8138      | miR-891a    | mir_601      | -2.0571      | miR-601     | mir_942      | -2.0220      | miR-492     |
| mir_22       | -1.8014      | miR-22      | mir_602      | -2.0347      | miR-602     | mir_608      | -2.0194      | miR-608     |
| mir_513a_2   | -1.7761      | miR-513a    | mir_770      | -2.0275      | miR-770     | mir_601      | -2.0144      | miR-601     |
| mir_891b     | -1.7693      | miR-891     | mir_584      | -2.0273      | miR-584     | mir_602      | -1.9996      | miR-602     |
| mir_218_1    | -1.7527      | miR-218     | mir_548a_2   | -2.0261      | miR-548a    | mir_543_     | -1.9873      | miT-543     |
| mir_513a_1   | -1.7165      | miR-513a    | mir_539      | -2.0213      | miR-539     | mir_223      | -1.9530      | miR-223     |
| mir_934      | -1.6903      | miR-934     | mir_551a     | -1.9773      | miR-551a    | mir_770      | -1.9518      | miR-770     |
| mir_514_1    | -1.6660      | miR-514     | mir_551b     | -1.9654      | miR-551b    | mir_562      | -1.9499      | miR-562     |
| mir_890      | -1.5240      | miR-890     | mir_30c_2    | -1.9639      | miR-30c     | mir_551a     | -1.9498      | miR-551a    |
| mir_508      | -1.4822      | miR-508     | mir_148a     | -1.9621      | miR-148     | mir_605      | -1.9373      | miR-605     |
| mir_200b     | -1.2109      | miR-200b    | mir_642      | -1.9431      | miR-642     | mir_148a     | -1.9164      | miR-148a    |
| mir_514_2    | -1.1794      | miR-514     | mir_221      | -1.9229      | miR-221     | mir_548a_2   | -1.8718      | miR-548a    |
| mir_491      | -1.0582      | miR-491     | mir_223      | -1.9089      | miR-223     | mir_642      | -1.8560      | miR-642     |
|              |              |             | mir_603      | -1.8850      | miR-603     | mir_30c_2    | -1.8510      | miR-30c     |
|              |              |             | mir_889      | -1.8614      | miR-889     | mir_200b     | -1.8254      | miR-200b    |
|              |              |             | mir_214      | -1.8330      | miR-214     | mir_603      | -1.8165      | miR-603     |
|              |              |             | mir_220b     | -1.8076      | miR-220b    | mir_221      | -1.7971      | miR-221     |
|              |              |             | mir_876      | -1.7357      | miR-876     | mir_214      | -1.7799      | miR-214     |
|              |              |             | mir_99a      | -1.7116      | miR-99a     | mir_584      | -1.7428      | miR-584     |
|              |              |             | mir_550_1    | -1.7049      | miR-550     | mir_22       | -1.6873      | miR-22      |
|              |              |             | mir_30c_1    | -1.7027      | miR-30c     | mir_491      | -1.6667      | miR-491     |
|              |              |             | mir_550_2    | -1.6782      | miR-550     | mir_220b     | -1.6575      | miR-220b    |
|              |              |             | mir_491      | -1.5603      | miR-491     | mir_218_1    | -1.6445      | miR-218     |
|              |              |             | mir_335      | -1.5452      | miR-335     | mir_99a      | -1.6321      | miR-99a     |
|              |              |             | mir_146a     | -1.5304      | miR-146a    | mir_876      | -1.6228      | miR-876     |
|              |              |             | mir_801      | -1.5265      | miR-801     | mir_550_1    | -1.6215      | miR-550     |
|              |              |             | mir_553      | -1.4319      | miR-553     | mir_934      | -1.5791      | miR-934     |
|              |              |             | mir_133a_2_  | -1.4203      | miR-133a    | mir_30c_1    | -1.5773      | miR-30c     |
|              |              |             | mir_887      | -1.4108      | miR-887     | mir_514_1    | -1.5629      | miR-514     |
|              |              |             | let_7f_2     | -1.3337      | let7f       | mir_335      | -1.5575      | miR-335     |
|              |              |             | mir_129_2    | -1.3250      | miR-129     | mir_550_2    | -1.5543      | miR-550     |
|              |              |             | mir_128b     | -1.3042      | miR-128     | mir_146a     | -1.4840      | miR-146a    |
|              |              |             | mir_581      | -1.2894      | miR-581     | mir_890      | -1.4535      | miR-890     |
|              |              |             | mir_193b     | -1.2738      | miR-193b    | mir_801      | -1.3823      | miR-801     |
|              |              |             | mir_101_1_   | -1.2460      | miR-101     | mir_508      | -1.3787      | miR-508     |
|              |              |             | mir_139      | -1.2234      | miR-139     | mir_553      | -1.3490      | miR-553     |
|              |              |             | mir_513a_1   | -1.2180      | miR-513a    | mir_887      | -1.3411      | miR-887     |
|              |              |             | mir_609      | -1.1896      | miR-609     | let_7f_2     | -1.2749      | let7f       |
|              |              |             | mir_873      | -1.1794      | miR-873     | mir_581      | -1.2729      | miR-581     |
|              |              |             | mir_513a_2   | -1.1105      | miR-513a    | mir_101_1_   | -1.2454      | miR-101     |
|              |              |             | mir_377_     | -1.0887      | miR-377     | mir_193b     | -1.2075      | miR-193b    |
|              |              |             | mir_130a     | -1.0315      | miR-130a    | mir_128b     | -1.1754      | miR-128b    |
|              |              |             |              |              |             | mir_139      | -1.1155      | miR-139     |
|              |              |             |              |              |             | mir_514_2    | -1.1105      | miR-514     |
|              |              |             |              |              |             | mir_377_     | -1.0870      | miR-377     |
|              |              |             |              |              |             | mir_130a     | -1.0173      | miR-130a    |

The list of dropout clones identified by functional screening. Three assay conditions (P1 vs P5, P5 vs P9 and P1 vs P9) are indicated in 3 different columns. The left of each column indicates the name of lentivirus miRNA clones, the center is dropout score (Cy5/Cy3, log10 ratio), and the right is the name of mature miRNA derived from the lentivirus clone.



Table S3. mRNAs up-regulated by miR-22

| fold change (> 2-fold) |              |              | Common name     | GeneSymbol |
|------------------------|--------------|--------------|-----------------|------------|
| 1st                    | 2nd          | 3rd          |                 |            |
| miR22/miRnc2           | miR22/miRnc2 | miR22/miRnc2 |                 |            |
| 2.346                  | 2.369        | 3.023        | NM_016270       | KLF2       |
| 1.497                  | 2.296        | 2.748        | NM_016201       | AMOTL2     |
| 1.252                  | 2.039        | 2.317        | NM_001964       | EGR1       |
| 1.506                  | 2.949        | 3.679        | NM_001554       | CYR61      |
| 2.664                  | 2.601        | 3.147        | NM_130469       | JDP2       |
| 1.828                  | 2.024        | 2.244        | NM_032865       | TNS4       |
| 1.387                  | 2.723        | 3.350        | NM_001554       | CYR61      |
| 2.545                  | 3.043        | 3.485        | NM_021913       | AXL        |
| 1.866                  | 2.010        | 2.316        | NM_001001555    | GRB10      |
| 1.548                  | 2.732        | 3.515        | NM_001554       | CYR61      |
| 2.278                  | 2.348        | 2.791        | NM_032463       | LAT2       |
| 2.145                  | 2.626        | 3.126        | NM_016352       | CPA4       |
| 2.967                  | 3.910        | 4.185        | NM_198951       | TGM2       |
| 2.128                  | 1.582        | 2.175        | NM_019083       | CCDC76     |
| 1.988                  | 2.798        | 3.641        | NM_014572       | LATS2      |
| 4.464                  | 8.188        | 9.668        | NM_182507       | KRT80      |
| 2.216                  | 1.377        | 2.127        | NM_030753       | WNT3       |
| 2.406                  | 2.763        | 3.280        | NM_016352       | CPA4       |
| 7.268                  | 4.898        | 6.251        | DA438590        | DA438590   |
| 2.254                  | 1.526        | 2.250        | THC2732721      | THC2732721 |
| 2.333                  | 2.469        | 3.619        | NM_014572       | LATS2      |
| 2.656                  | 3.391        | 4.250        | NM_004734       | DCLK1      |
| 2.273                  | 3.901        | 4.815        | NM_001901       | CTGF       |
| 69.503                 | 0.842        | 19.518       | AF116677        | AF116677   |
| 2.117                  | 2.539        | 2.835        | NM_144677       | MGAT5B     |
| 2.906                  | 1.524        | 2.404        | THC2579650      | THC2579650 |
| 2.094                  | 1.923        | 2.786        | DQ080207        | MIG7       |
| 2.989                  | 2.372        | 3.041        | NM_005358       | LMO7       |
| 2.277                  | 2.810        | 3.674        | ENST00000367013 | C1orf133   |
| 1.524                  | 2.128        | 2.166        | AB028976        | SAMD4A     |
| 3.256                  | 4.654        | 5.850        | NM_001955       | EDN1       |
| 2.171                  | 2.114        | 2.510        | AK057956        | AK057956   |
| 1.953                  | 2.509        | 2.867        | NM_001008540    | CXCR4      |
| 1.602                  | 2.091        | 2.293        | NM_020349       | ANKRD2     |
| 2.181                  | 2.967        | 3.176        | NM_004613       | TGM2       |
| 2.473                  | 5.143        | 0.850        | NM_030639       | BHLHB9     |
| 3.394                  | 6.101        | 8.744        | BC073764        | IGKC       |
| 1.496                  | 3.602        | 2.643        | BC019234        | ZNF273     |
| 1.616                  | 2.183        | 2.289        | NM_013962       | NRG1       |
| 2.139                  | 2.756        | 3.304        | NM_003246       | THBS1      |
| 2.099                  | 1.932        | 2.911        | BX647685        | BX647685   |
| 7.790                  | 1.407        | 2.450        | THC2612011      | THC2612011 |
| 2.170                  | 1.648        | 2.331        | AK002200        | SMC4       |
| 7.721                  | 4.703        | 0.601        | BC031641        | C10orf128  |
| 1.936                  | 2.290        | 2.999        | NM_020632       | ATP6V0A4   |
| 20.544                 | 2.068        | 0.099        | AF020645        | AF020645   |
| 3.891                  | 1.609        | 4.452        | NM_003015       | SFRP5      |
| 2.696                  | 0.721        | 4.139        | NM_005527       | HSPA1L     |
| 1.908                  | 2.132        | 2.489        | NM_001031741    | NEK10      |
| 2.392                  | 1.254        | 2.142        | THC2609820      | THC2609820 |
| 2.110                  | 3.702        | 3.806        | NM_015881       | DKK3       |
| 2.063                  | 2.200        | 1.486        | NR_001589       | HBBP1      |
| 23.044                 | 20.421       | 1.073        | AK026149        | TUSC3      |
| 3.290                  | 2.722        | 1.043        | NM_006352       | ZNF238     |
| 1.154                  | 2.280        | 3.304        | NM_182898       | CREB5      |

|        |        |        |                 |                 |
|--------|--------|--------|-----------------|-----------------|
| 2.490  | 0.251  | 4.784  | NM_001012391    | RUNDC2B         |
| 2.043  | 1.830  | 2.383  | NM_001008394    | EID3            |
| 2.009  | 1.494  | 2.072  | NM_032464       | LAT2            |
| 2.251  | 1.703  | 2.257  | THC2604590      | THC2604590      |
| 2.568  | 1.427  | 2.480  | NM_173077       | CPO             |
| 15.544 | 22.956 | 10.852 | NM_182898       | CREB5           |
| 19.193 | 9.800  | 1.054  | AA827683        | AA827683        |
| 3.001  | 2.960  | 4.395  | NM_000584       | IL8             |
| 2.225  | 1.445  | 2.183  | NM_182527       | CABP7           |
| 3.165  | 2.471  | 2.645  | NM_020182       | TMEPAI          |
| 2.558  | 2.692  | 4.165  | NM_000509       | FGG             |
| 12.737 | 10.072 | 0.996  | BC041467        | C17orf67        |
| 3.562  | 2.065  | 4.434  | ENST00000299694 | ENST00000299694 |
| 2.957  | 2.294  | 0.732  | AU157551        | AU157551        |
| 1.718  | 2.242  | 2.645  | ENST00000370548 | ENST00000370548 |
| 3.308  | 5.512  | 2.110  | AK025303        | KIF13A          |
| 1.876  | 2.433  | 2.585  | NM_018993       | RIN2            |
| 3.367  | 3.865  | 1.791  | AF035035        | IGKV1D-8        |
| 1.601  | 6.019  | 2.253  | BX112970        | BX112970        |
| 1.156  | 3.513  | 2.511  | NM_018996       | TNRC6C          |
| 2.383  | 1.793  | 2.196  | AL137653        | CTBP1           |
| 3.784  | 2.773  | 3.754  | CV570707        | CV570707        |
| 10.305 | 7.556  | 0.049  | NM_058172       | ANTXR2          |
| 1.368  | 2.903  | 2.329  | H28997          | H28997          |
| 2.155  | 2.013  | 1.901  | NM_005771       | DHRS9           |
| 2.290  | 1.124  | 2.119  | NM_002203       | ITGA2           |
| 1.411  | 2.915  | 3.440  | NM_144777       | SCEL            |
| 1.665  | 2.643  | 2.159  | NM_001011703    | FAM125B         |
| 2.981  | 0.231  | 4.217  | NM_172311       | SALF            |
| 2.054  | 0.659  | 3.375  | AK097149        | UNQ1887         |
| 8.982  | 1.026  | 4.279  | BE858685        | BE858685        |
| 2.017  | 1.379  | 9.313  | NM_001080542    | FBF1            |
| 3.048  | 2.001  | 5.801  | ENST00000367012 | SERTAD4         |
| 1.108  | 2.244  | 3.719  | AK057304        | FLJ32742        |
| 4.627  | 2.489  | 4.186  | NM_182507       | KRT80           |
| 2.727  | 1.858  | 10.636 | NM_025047       | ARL14           |
| 2.056  | 2.841  | 4.001  | NM_000728       | CALCB           |
| 1.621  | 2.002  | 2.704  | THC2516687      | THC2516687      |
| 1.735  | 2.452  | 2.839  | NM_001299       | CNN1            |
| 1.810  | 2.689  | 3.256  | NM_000800       | FGF1            |
| 1.818  | 3.674  | 3.038  | NM_032782       | HAVCR2          |
| 2.266  | 2.416  | 3.302  | NM_003038       | SLC1A4          |
| 3.685  | 0.697  | 25.119 | AY326436        | RIC3            |
| 3.047  | 2.518  | 2.328  | AK025758        | AK025758        |
| 2.160  | 1.365  | 6.630  | NM_152756       | RICTOR          |
| 2.163  | 2.225  | 0.764  | NM_002145       | HOXB2           |
| 0.731  | 3.752  | 3.709  | BC039082        | TMPRSS6         |
| 2.391  | 1.282  | 2.410  | AY055760        | CD55            |
| 1.254  | 2.081  | 2.469  | XM_001132569    | LOC730130       |
| 2.542  | 1.296  | 3.353  | NM_024600       | C16orf30        |
| 1.244  | 2.131  | 3.035  | AK096488        | C1orf83         |
| 3.262  | 5.277  | 0.612  | NM_004440       | EPHA7           |
| 3.695  | 4.391  | 1.571  | NM_153046       | TDRD9           |
| 4.978  | 1.846  | 3.227  | NM_004543       | NEB             |
| 2.488  | 1.262  | 2.432  | NM_206855       | QKI             |
| 1.400  | 4.490  | 2.399  | NM_174927       | SPATA19         |
| 2.139  | 1.172  | 2.795  | NM_001116       | ADCY9           |
| 4.661  | 4.646  | 4.781  | NM_019605       | SERTAD4         |
| 2.570  | 1.183  | 3.589  | ENST00000378204 | EXT1            |
| 1.747  | 2.490  | 2.642  | NM_018661       | DEFB103A        |

|       |        |        |              |            |       |
|-------|--------|--------|--------------|------------|-------|
| 0.998 | 2.320  | 2.201  | NM_014070    | C6orf15    |       |
| 2.159 | 1.229  | 4.982  | L10403       | PPBPL2     |       |
| 2.638 | 2.192  | 1.524  | NM_152592    | C14orf49   |       |
| 2.539 | 4.233  | 7.770  | AK094154     | AK094154   |       |
| 4.181 | 2.274  | 1.830  | THC2655194   | THC2655194 |       |
| 2.709 | 7.568  | 1.014  | BC034285     | BC034285   |       |
| 2.546 | 4.266  | 5.838  | THC2634493   | THC2634493 |       |
| 1.658 | 3.374  | 2.200  | NM_000267    | NF1        |       |
| 1.336 | 4.795  | 11.241 | NM_145004    | ADAM32     |       |
| 1.943 | 5.438  | 6.682  | NM_000800    | FGF1       |       |
| 3.653 | 4.409  | 1.294  | AK096956     | AK096956   |       |
| 2.165 | 2.892  | 1.716  | BC034497     | FAM124A    |       |
| 1.125 | 2.407  | 2.977  | BX114358     | BX114358   |       |
| 4.689 | 6.061  | 1.067  | NM_031409    | CCR6       |       |
| 2.121 | 1.844  | 9.732  | THC2675521   | THC2675521 |       |
| 2.388 | 0.882  | 11.897 | NM_134431    | SLCO1A2    |       |
| 1.436 | 2.317  | 3.156  | NM_001003811 | TEX11      |       |
| 3.926 | 4.878  | 0.222  | U79301       | U79301     |       |
| 1.424 | 2.168  | 2.213  | AI161251     | AI161251   |       |
| 3.152 | 1.330  | 5.063  | BC044620     | C9orf57    |       |
| 2.611 | 22.220 | 1.005  | AB063115     | NAV2       |       |
| 1.055 | 5.418  | 2.656  | NM_005337    | NCKAP1L    |       |
| 1.349 | 6.872  | 11.582 | NM_152868    | KCNJ4      |       |
| 1.284 | 4.013  | 2.744  | NM_024574    | C4orf31    |       |
| 1.512 | 2.287  | 2.414  | NM_144992    | MGC26733   |       |
| 2.104 | 2.197  | 3.296  | NM_000887    | ITGAX      |       |
| 2.067 | 5.382  | 6.431  | NM_020814    |            | 39876 |
| 1.820 | 3.122  | 8.193  | NM_000936    | PNLIP      |       |
| 2.739 | 2.686  | 28.921 | NM_201648    | GLYAT      |       |
| 0.711 | 7.677  | 2.941  | L17328       | FEZ2       |       |
| 2.033 | 4.487  | 5.254  | U09850       | ZNF143     |       |
| 1.563 | 9.012  | 10.782 | NM_000547    | TPO        |       |
| 1.498 | 4.903  | 5.556  | NM_000353    | TAT        |       |
| 1.443 | 6.188  | 12.767 | CA946373     | CA946373   |       |
| 0.979 | 13.619 | 8.049  | NM_000433    | NCF2       |       |
| 1.140 | 6.766  | 24.352 | BC025666     | BC025666   |       |
| 0.711 | 15.406 | 34.697 | AK074236     | SLC14A2    |       |

mRNAs were selected to show the up-regulation in at least two experiments

Table S4. mRNA down-regulated by miR-22

| fold change (< 0.5 fold) |              |              | Common name     | GeneSymbol      |
|--------------------------|--------------|--------------|-----------------|-----------------|
| 1st                      | 2nd          | 3rd          |                 |                 |
| miR22/miRnc2             | miR22/miRnc2 | miR22/miRnc2 |                 |                 |
| 0.498                    | 0.445        | 0.577        | NM_002129       | HMGB2           |
| 0.411                    | 0.315        | 0.409        | ENST00000229270 | ENST00000229270 |
| 0.609                    | 0.392        | 0.495        | NM_002961       | S100A4          |
| 0.508                    | 0.393        | 0.478        | NM_022126       | LHPP            |
| 0.495                    | 0.464        | 0.425        | NM_024336       | IRX3            |
| 0.390                    | 0.311        | 0.377        | NM_002923       | RGS2            |
| 0.448                    | 0.326        | 0.430        | NM_003721       | RFXANK          |
| 0.456                    | 0.445        | 0.549        | THC2474831      | THC2474831      |
| 0.545                    | 0.405        | 0.484        | NM_152832       | FAM89B          |
| 0.472                    | 0.356        | 0.423        | NM_004192       | ASMTL           |
| 0.408                    | 0.369        | 0.477        | NM_032284       | PRPF38A         |
| 0.753                    | 0.412        | 0.485        | NM_001002021    | PFKL            |
| 0.489                    | 0.394        | 0.534        | NM_032932       | RAB11FIP4       |
| 0.472                    | 0.338        | 0.412        | NM_004192       | ASMTL           |
| 0.475                    | 0.381        | 0.487        | NM_018664       | SNFT            |
| 0.412                    | 0.273        | 0.364        | NM_033285       | TP53INP1        |
| 0.487                    | 0.422        | 0.498        | NM_000314       | PTEN            |
| 0.457                    | 0.327        | 0.465        | AB016898        | LOC653483       |
| 0.625                    | 0.460        | 0.496        | NM_025083       | EDC3            |
| 0.377                    | 0.263        | 0.327        | NM_207578       | PRKACB          |
| 0.637                    | 0.407        | 0.497        | NM_001038       | SCNN1A          |
| 0.377                    | 0.317        | 0.408        | NM_003385       | VSNL1           |
| 0.473                    | 0.407        | 0.521        | ENST00000244221 | PAIP2B          |
| 2.053                    | 0.296        | 0.385        | NM_006889       | CD86            |
| 0.541                    | 0.489        | 0.481        | NM_002055       | GFAP            |
| 0.099                    | 3.151        | 0.189        | CB854194        | CB854194        |
| 0.467                    | 0.436        | 0.490        | BX648343        | KRTAP4-7        |
| 0.552                    | 0.468        | 0.498        | NM_003118       | SPARC           |
| 0.620                    | 0.396        | 0.483        | NM_002868       | RAB5B           |
| 0.295                    | 0.483        | 1.003        | NM_001005273    | CHD3            |
| 0.216                    | 0.711        | 0.168        | BC038840        | NAALAD2         |
| 0.450                    | 0.369        | 0.521        | NM_001040152    | PEG10           |
| 0.615                    | 0.449        | 0.500        | NM_003469       | SCG2            |
| 0.468                    | 0.438        | 0.396        | NM_004041       | ARRB1           |
| 0.479                    | 0.370        | 0.487        | NM_054014       | FKBP1A          |
| 0.516                    | 0.411        | 0.469        | NM_005269       | GLI1            |
| 0.533                    | 0.245        | 0.426        | NM_005540       | INPP5B          |
| 0.458                    | 0.379        | 0.386        | NM_001017915    | INPP5D          |
| 0.441                    | 0.429        | 0.480        | NM_030929       | KAZALD1         |
| 0.568                    | 0.373        | 0.431        | NM_006454       | MXD4            |
| 1.015                    | 0.277        | 0.382        | NM_004917       | KLK4            |
| 0.024                    | 0.225        | 1.137        | AK124129        | DKFZP434H168    |
| 0.636                    | 0.454        | 0.495        | NM_001001438    | LSS             |
| 0.382                    | 1.067        | 0.248        | NM_005408       | CCL13           |
| 0.464                    | 0.343        | 0.449        | NM_004664       | LIN7A           |
| 0.123                    | 0.256        | 0.607        | NM_001037231    | LOC285735       |
| 0.332                    | 0.458        | 1.077        | ENST00000344523 | NR6A1           |
| 0.140                    | 0.053        | 1.170        | BC037791        | BC037791        |
| 1.029                    | 0.455        | 0.307        | NM_018265       | C1orf106        |
| 0.241                    | 0.222        | 0.801        | AF217973        | AF217973        |
| 0.364                    | 0.190        | 1.075        | XM_001128267    | LOC730704       |
| 0.372                    | 0.231        | 0.272        | NM_005540       | INPP5B          |
| 0.395                    | 0.086        | 0.524        | NM_014668       | GREB1           |
| 0.637                    | 0.377        | 0.458        | AB039791        | ARP11           |
| 0.333                    | 0.451        | 3.961        | NM_015025       | MYT1L           |

|       |       |       |                 |                 |
|-------|-------|-------|-----------------|-----------------|
| 0.083 | 0.159 | 0.388 | NM_001080437    | SNED1           |
| 0.499 | 0.843 | 0.465 | AJ278120        | TANC2           |
| 0.130 | 0.312 | 1.024 | ENST00000305752 | FAM98B          |
| 0.695 | 0.308 | 0.174 | THC2554861      | THC2554861      |
| 0.958 | 0.058 | 0.306 | ENST00000377525 | ENST00000377525 |
| 0.356 | 0.302 | 0.767 | NM_172249       | CSF2RA          |
| 0.443 | 0.399 | 0.403 | BG719660        | BG719660        |
| 0.681 | 0.193 | 0.254 | NM_003896       | ST3GAL5         |
| 0.686 | 0.206 | 0.326 | NM_025212       | CXXC4           |
| 0.460 | 0.952 | 0.349 | NM_145208       | MBD3L1          |
| 0.486 | 0.393 | 0.555 | AK022997        | AK022997        |
| 0.528 | 0.200 | 0.460 | NM_006608       | PHTF1           |
| 0.596 | 0.308 | 0.449 | ENST00000305749 | CXXC4           |
| 0.848 | 0.436 | 0.399 | AB051473        | PLEKHA5         |
| 0.481 | 0.355 | 0.307 | AK054626        | FLJ30064        |
| 1.047 | 0.274 | 0.391 | AK057476        | AK057476        |
| 0.069 | 0.060 | 1.003 | NM_024867       | FLJ23577        |
| 0.396 | 0.462 | 1.245 | NM_015596       | KLK13           |
| 0.618 | 0.464 | 0.327 | NM_000834       | GRIN2B          |
| 0.808 | 0.320 | 0.449 | NM_001850       | COL8A1          |
| 1.836 | 0.326 | 0.435 | NM_025193       | HSD3B7          |
| 0.764 | 0.463 | 0.486 | NM_021200       | PLEKHB1         |
| 0.225 | 0.294 | 0.854 | NM_000651       | CR1             |
| 0.356 | 0.343 | 2.250 | NM_144727       | CRYGN           |
| 0.810 | 0.229 | 0.227 | NM_005036       | PPARA           |
| 0.273 | 0.224 | 0.555 | BQ775944        | BQ775944        |
| 0.216 | 1.968 | 0.184 | AK024328        | ABCA1           |
| 0.857 | 0.475 | 0.095 | NM_014660       | PHF14           |
| 1.220 | 0.246 | 0.274 | BF959143        | BF959143        |
| 0.737 | 0.286 | 0.227 | BC026179        | SEC61A2         |
| 0.322 | 0.146 | 1.263 | THC2746042      | THC2746042      |
| 0.458 | 0.130 | 0.221 | THC2732175      | THC2732175      |
| 0.499 | 0.487 | 0.950 | AK023372        | FLJ13310        |
| 1.330 | 0.284 | 0.280 | NM_001836       | CMA1            |
| 0.242 | 0.837 | 0.212 | NM_022360       | FAM12B          |
| 0.885 | 0.223 | 0.138 | NM_018371       | ChGn            |
| 0.698 | 0.193 | 0.489 | NM_173081       | ARMC3           |
| 1.288 | 0.261 | 0.129 | NM_023914       | P2RY13          |
| 0.885 | 0.348 | 0.188 | NM_153236       | GIMAP7          |
| 0.408 | 0.500 | 0.333 | NM_001010978    | LDLRAD1         |
| 0.429 | 0.291 | 1.477 | NM_021225       | PROL1           |
| 0.917 | 0.173 | 0.171 | NM_012298       | CAND2           |
| 0.745 | 0.366 | 0.321 | NM_017820       | FLJ20433        |
| 2.680 | 0.313 | 0.463 | AW502318        | AW502318        |
| 1.105 | 0.325 | 0.195 | AK126097        | LOC285827       |
| 0.708 | 0.406 | 0.192 | NM_017855       | ODAM            |
| 1.659 | 0.177 | 0.391 | NM_014333       | CADM1           |
| 3.479 | 0.085 | 0.286 | NM_004464       | FGF5            |
| 0.884 | 0.203 | 0.214 | NM_133448       | TMEM132D        |
| 3.085 | 0.048 | 0.186 | NM_016592       | GNAS            |
| 0.614 | 0.068 | 0.210 | NM_001005733    | C21orf34        |
| 0.704 | 0.178 | 0.207 | BC030609        | BC030609        |
| 0.626 | 0.049 | 0.132 | NM_001001317    | TRY1            |
| 0.627 | 0.113 | 0.049 | NM_000689       | ALDH1A1         |
| 0.710 | 0.099 | 0.115 | NM_080818       | OXGR1           |
| 2.618 | 0.113 | 0.066 | NM_025113       | C13orf18        |
| 0.638 | 0.035 | 0.103 | NM_173645       | FLJ37357        |

mRNA down-regulated by miR-22 in at least two experiments were selected
